# Supplementary material
Source: publisher figshare collection journal article supplement (https://acs.figshare.com/ndownloader/files/3762526)
Supplement: Supplementary file 1 [file 3762526]

## **Electrochemical Nucleation of Stable N<sub>2</sub> Nanobubbles at Pt Nanoelectrodes**

*Qianjin Chen<sup>1</sup>, Hilke S. Wiedenroth<sup>1,2</sup>, Sean R. German<sup>1,3</sup> and Henry S. White<sup>1\*</sup>*

1. Department of Chemistry, University of Utah, 315 S 1400 E, Salt Lake City, Utah 84112

2. Department of Environmental and Sustainable Chemistry, Braunschweig University of Technology, Hagenring 30, Braunschweig 38106, Germany

3. Revalesio Corporation, 1200 East D Street, Tacoma, Washington 98421

### **Table of Contents**

|                                                                            |             |
|----------------------------------------------------------------------------|-------------|
| <i>1. Characterization of Pt nanodisk electrodes</i> .....                 | <i>SI-2</i> |
| <i>2. Dependence of the voltammetric responses on immersion time</i> ..... | <i>SI-3</i> |
| <i>3 Voltammetric response of a 98 nm radius Pt electrode</i> .....        | <i>SI-4</i> |

1. Characterization of Pt nanodisk electrodes

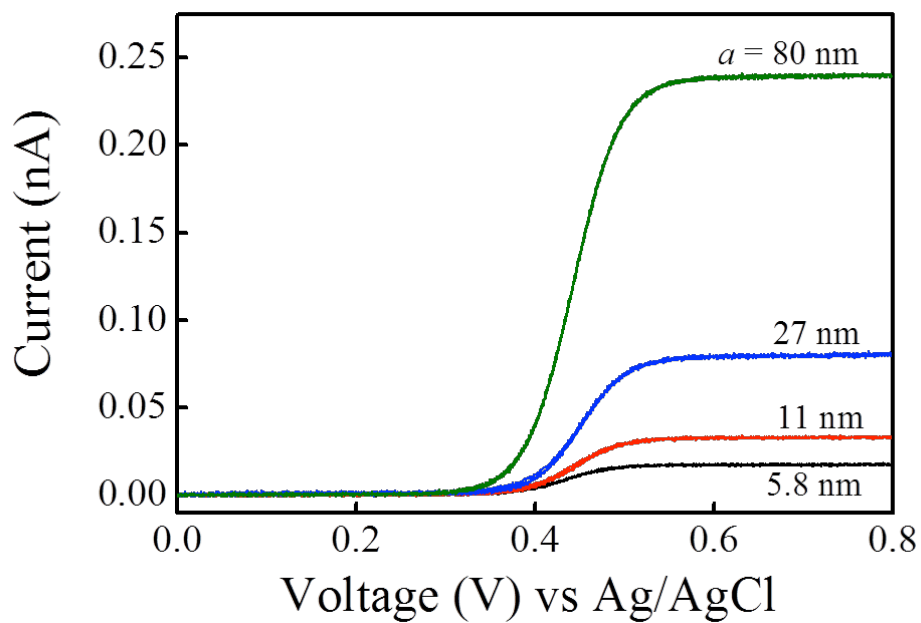

**Figure S1.** Voltammetric response of Pt nanodisk electrodes immersed in  $\text{CH}_3\text{CN}/0.1$  M  $\text{TBAPF}_6$  containing 5.0 mM ferrocene (Fc) at 20 mV/s. The electrode radii,  $a$ , were calculated from the diffusion limiting current,  $i_d$ , using the expression  $i_d = 4nFD_{\text{Fc}}C_{\text{Fc}}^*a$ , where  $D_{\text{Fc}}$  and  $C_{\text{Fc}}^*$  are the diffusivity and bulk concentration of Fc, respectively,  $F$  = Faraday's constant, and  $n = 1$ . The curves show both the forward and reverse scans.

## 2. Dependence of the voltammetric responses on immersion time

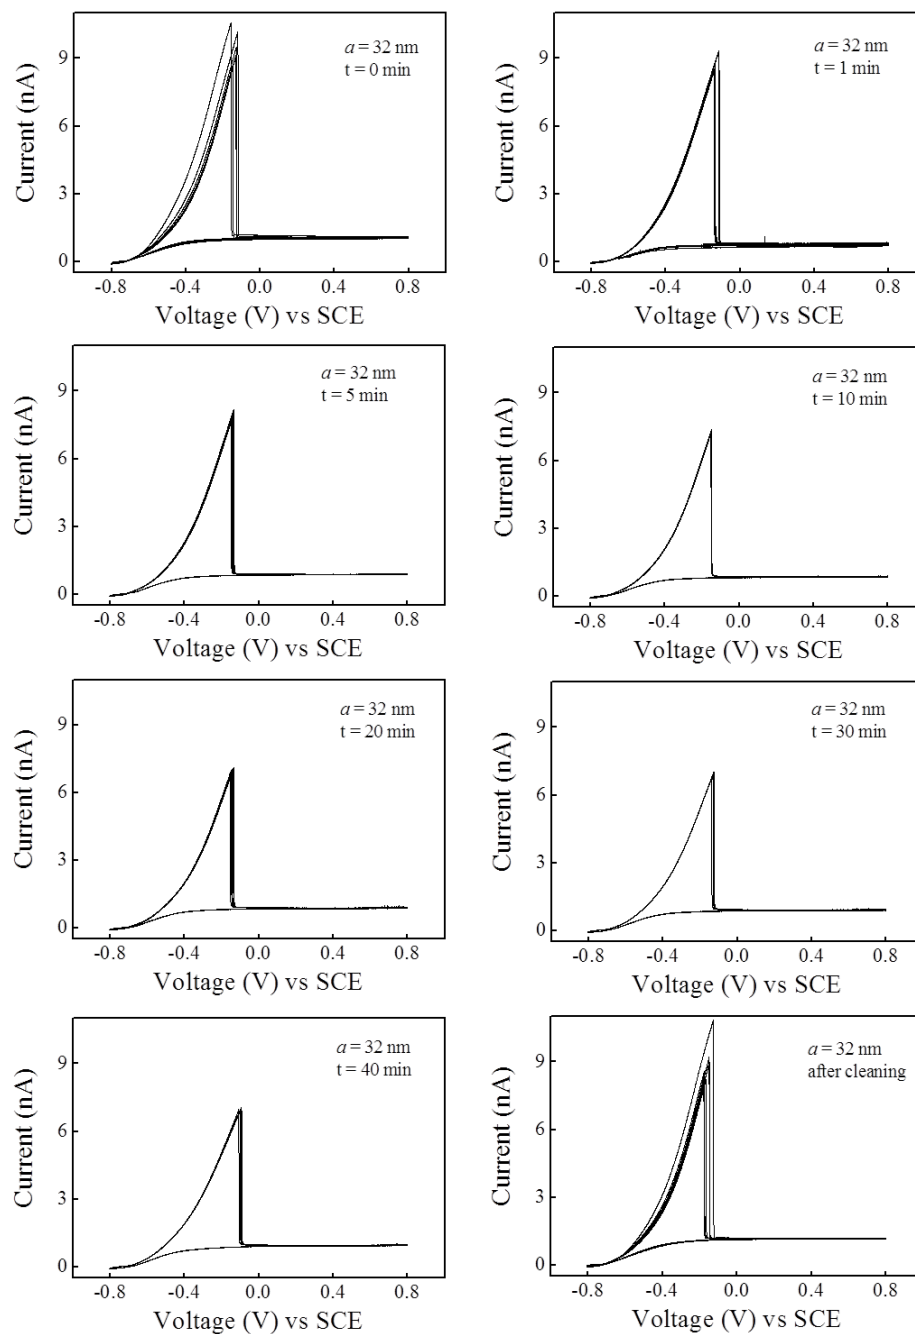

**Figure S2.** Cyclic voltammograms at 200 mV/s for a 32-nm radius disk electrode in 1.0 M  $\text{N}_2\text{H}_4$  solution after various immersion times: fresh electrode ( $t = 0$  min),  $t = 1, 5, 10, 20, 30$  and 40 min, and after the electrode was carefully cleaned (bottom right) by rinsing with copious amounts of  $\text{CH}_3\text{CN}$  and water to remove adsorbed species. The electrode potential was continuously scanned during the time intervals between two consecutive voltammetric measurements.

### 3. Voltammetric response of a 98 nm-radius Pt electrode

On the initial scan, a sudden current drop occurs at potential  $\sim 0$  V, but immediately recovers to a constant current level that is the characteristic of the diffusion limited oxidation of  $\text{N}_2\text{H}_4$ . The response indicates that a  $\text{N}_2$  nanobubble nucleates, but fails to cover the entire electrode surface. In the subsequent scans, we observed sigmoidal-like voltammetric response with significant hysteresis. A significant drop of the current plateau between two consecutive cycles is also observed (the direction of increasing scans is indicated by the arrow labeled *c*), which is most likely due to the Pt deactivation by adsorption of  $\text{N}_2\text{H}_4$  and the intermediates.

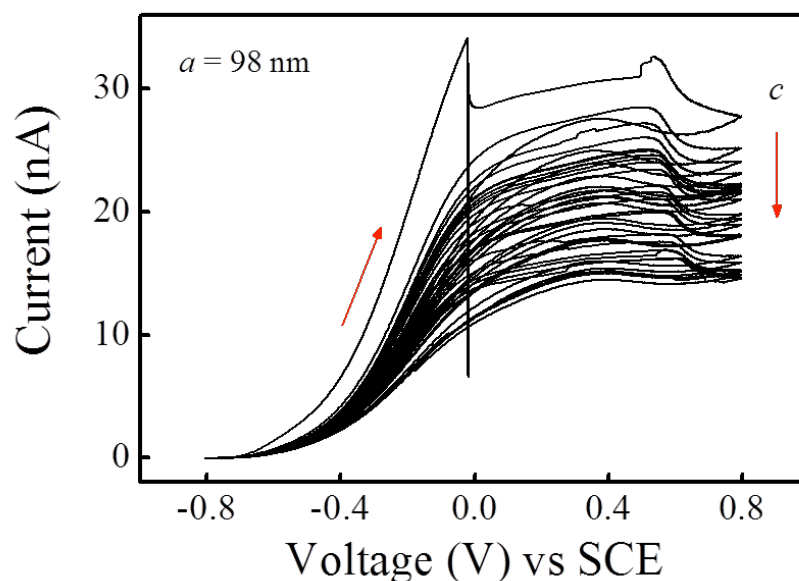

**Figure S3** Cyclic voltammograms at 200 mV/s for a 98-nm radius disk electrode in 1.0 M  $\text{N}_2\text{H}_4$  solution at different scan cycles (within 5 min of immersion). In the initial scan cycle, a peak shaped voltammetric response appeared at  $\sim 0$  V.
